# Supplementary material for: Self-directed multimedia process for delivering participant informed consent
Source: PubMed Central journal article supplement — BMJ Open. 2020 Jul 26;10(7):e036977. doi: 10.1136/bmjopen-2020-036977 (PMC7383955; doi:10.1136/bmjopen-2020-036977), 2020-07-26
Supplement: bmjopen-2020-036977supp001.pdf [file bmjopen-2020-036977supp001.pdf]

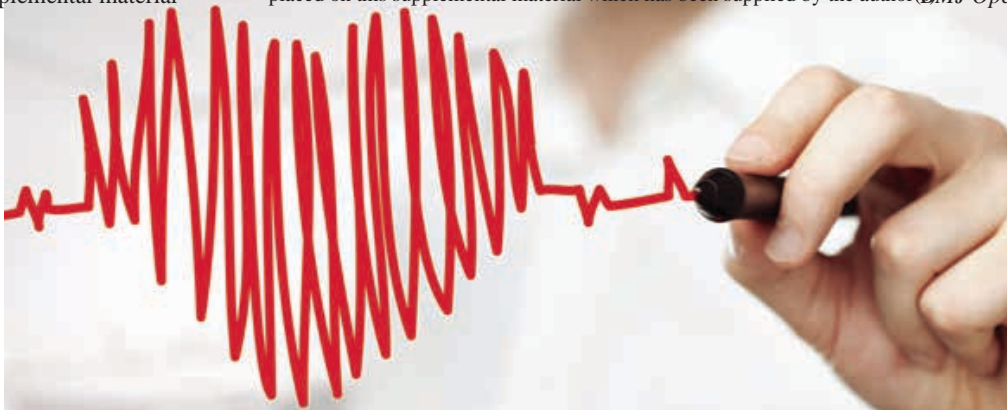

## **IDEAL Study**

Improved cardiovascular  
Disease hEALth service  
delivery in Australia

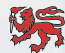

UNIVERSITY of  
TASMANIA

MENZIES   
Institute for Medical Research

## IDEAL Study

The IDEAL study aims to lower the risk of people developing cardiovascular disease, including heart attack and stroke.

Patients attending Hobart Pathology, 20-22 Gregory St, Sandy Bay, for a cholesterol test may be eligible to participate.

If you wish to participate, medical health information and blood pressure will be recorded in a specially built booth.

A risk score on the chances of having a cardiovascular event in the next five years will be calculated and sent to your GP.

This risk score is based on best-practice medicine and is designed to help doctors

make better-informed decisions to manage the risk of cardiovascular disease.

You may also be invited to attend optional follow-up studies, which include a full cardiovascular assessment or attending a focus group on cardiovascular disease and primary healthcare.

### For further information

Email: [menzies.ideal@utas.edu.au](mailto:menzies.ideal@utas.edu.au)

Phone: (03) 6226 7700

**[www.menzies.utas.edu.au/research/ideal\\_study](http://www.menzies.utas.edu.au/research/ideal_study)**

CRICOS Provider Code: 00586B
